# Supplementary material for: Molecular mechanisms of CBASS phospholipase effector CapV mediated membrane disruption
Source: Research Square preprint supplement (doi:10.21203/rs.3.rs-6158033/v1), 2025-04-01
Supplement: Supplementary file 1 [file 3d1ed08003599a8fb21146a7.docx]

**Extended Data Table 1 | Cryo-EM data collection, refinement and validation statistics.**

|  | *Ab*CapV dimer  apo state  (EMD-61417)  (PDB 9JEH) | *Ab*CapV tetramer  intermediate state  (EMD-61419)  (PDB 9JEK) |
| --- | --- | --- |
| **Data collection and processing** |  |  |
| Magnification | 165 k | 165 k |
| Voltage (kV) | 300 | 300 |
| Electron exposure (e–/Å2) | 50 | 50 |
| Defocus range (μm) | -1.0 to -2.4 | -1.0 to -2.4 |
| Pixel size (Å) | 0.73 | 0.73 |
| Symmetry imposed | C1 | C1 |
| Initial particle images (no.) | 2,042,706 | 2,042,706 |
| Final particle images (no.) | 271,245 | 212,077 |
| Map resolution (Å)  FSC threshold | 2.9  0.143 | 3.1  0.143 |
| **Refinement** |  |  |
| Initial model used (PDB code) | AlphaFold3 | AlphaFold3 |
| Model resolution (Å)  FSC threshold | 3.2  0.5 | 3.3  0.5 |
| Map sharpening *B* factor (Å2) | 115.8 | 98.2 |
| Model composition  Non-hydrogen atoms  Protein residues  Nucleotide residues  Ligands | 5434  684  0  0 | 10868  1368  0  0 |
| *B* factors (mean, Å2)  Protein  Nucleotide  Ligand | 66.42  n.a.  n.a. | 76.22  n.a.  n.a. |
| R.m.s. deviations  Bond lengths (Å)  Bond angles (°) | 0.002  0.557 | 0.002  0.620 |
| Validation  MolProbity score  Clashscore  Poor rotamers (%) | 2.20  10.67  2.03 | 2.30  12.40  2.54 |
| Ramachandran plot  Favored (%)  Allowed (%)  Disallowed (%) | 93.68  6.03  0.29 | 94.34  5.51  0.15 |

|  | *Ab*CapV filament with 3’3’-cGAMP bounded  active state  (EMD-60393)  (PDB 8ZR9) | *Ab*CapVS58A filament with 3’3’-cGAMP bounded  active state  (EMD-62291)  (PDB 9KEJ) |
| --- | --- | --- |
| **Data collection and processing** |  |  |
| Magnification | 130 k | 130 k |
| Voltage (kV) | 300 | 300 |
| Electron exposure (e–/Å2) | 40 | 40 |
| Defocus range (μm) | -0.6 to -2.0 | -1.0 to -2.4 |
| Pixel size (Å) | 0.932 | 0.932 |
| Symmetry imposed | C1 | C1 |
| Initial particle images (no.) | 529,485 | 421,969 |
| Final particle images (no.) | 435,584 | 204,417 |
| Map resolution (Å)  FSC threshold | 2.7  0.143 | 3.0  0.143 |
| **Refinement** |  |  |
| Initial model used (PDB code) | AlphaFold3 | AlphaFold3 |
| Model resolution (Å)  FSC threshold | 2.9  0.5 | 3.1  0.5 |
| Map sharpening *B* factor (Å2) | 0 | 88.7 |
| Model composition  Non-hydrogen atoms  Protein residues  Nucleotide residues  Ligands | 16692  2064  0  6 | 16638  2058  0  6 |
| *B* factors (mean, Å2)  Protein  Nucleotide  Ligand | 115.42  n.a.  106.30 | 90.02  n.a.  79.47 |
| R.m.s. deviations  Bond lengths (Å)  Bond angles (°) | 0.002  0.481 | 0.002  0.537 |
| Validation  MolProbity score  Clashscore  Poor rotamers (%) | 1.90  8.47  1.74 | 1.93  8.86  1.53 |
| Ramachandran plot  Favored (%)  Allowed (%)  Disallowed (%) | 96.15  3.80  0.05 | 95.45  4.20  0.34 |

**Extended Data Table 2 | Primers used in this study.**

| Name | Sequence |
| --- | --- |
| VcDncV F | CGTAGAGGATCGAGATCTCGATCCC |
| VcDncV R | TTACAACGCCTTCGCCAGC |
| GFP F | GAAAACCTGTATTTTCAGGGCATGGTG |
| GFP R | TTTCTCAAACTGAGGGTGTGACCAATG |
| VcDncV D131A D133A F | AGATGGCGATTGCGGACGGCACCTACATGCC |
| VcDncV D131A D133A R | CGTCCGCAATCGCCATCTCTTGACCCGGTTGAAAC |
| AbCapV S58A F | TGGTACCGCCATTGGTGGTATCCTGGC |
| AbCapV S58A R | CCACCAATGGCGGTACCAGTGATCAGATCGAAG |
| AbCapV R21A F | GAGTTGCGGGCTTGTTTACCATCACTTTGTTAGC |
| AbCapV R21A R | TAAACAAGCCCGCAACTCCGCCACCATTCAG |
| AbCapV D192A F | TACTTCGCCGCGGGTGGCTTGGTTGCAAAC |
| AbCapV D192A R | GCCACCCGCGGCGAAGTAGTTTTCGAGCTTCT |
| AbCapV K146A F | GTAAGCCAGCGTTCTTCAAAACCCCGCACA |
| AbCapV K146A R | TGAAGAACGCTGGCTTACCGGTTGACAGAT |
| AbCapV F147A F | CCAAAAGCGTTCAAAACCCCGCACAACC |
| AbCapV F147A R | GGTTTTGAACGCTTTTGGCTTACCGGTTGACAGATTAA |
| AbCapV F156A F | CCCGATGGCGACCATGGATCGTGAGATCCG |
| AbCapV F156A R | TCCATGGTCGCCATCGGGTTGTGCGGG |
| AbCapV D159A F | TACCATGGCGCGTGAGATCCGTTTGATTGATGC |
| AbCapV D159A R | ATCTCACGCGCCATGGTAAACATCGGGTTGTGC |
| AbCapV K149A F | AATTCTTCGCGACCCCGCACAACCC |
| AbCapV K149A R | GCGGGGTCGCGAAGAATTTTGGCTTACCGGTTGA |
| AbCapV E207A F | GTATTCGTGCGGTCCTGATCGACATGAAAAACGAC |
| AbCapV E207A R | TCAGGACCGCACGAATACCGATATAGCTCGGG |
| AbCapV R279A F | TGCTGTTAGCGGAGTTTGAGGCTCTGAAGATCG |
| AbCapV R279A R | CAAACTCCGCTAACAGCATGAAACGTTGCAGA |
| AbCapV E328A F | TGGCAGCGGCGCGTTACACCAAGAACGAGGAAC |
| AbCapV E328A R | TGTAACGCGCCGCTGCCAATTTTTTACCAGAAC |
| AbCapV T331A K332A F | GAGCGTTACGCGGCGAACGAGGAACTGCGCAAT |
| AbCapV T331A K332A R | GTTCGCCGCGTAACGCTCCGCTGCC |
| AbCapV K38E F | TCATCGAAGAACGTGAGAAATGTGAAAACGTGAAAATTG |
| AbCapV K38E R | TCTCACGTTCTTCGATGATGCTTTCCAGTTCG |
| AbCapV E187A F | AAGCTCGCGAACTACTTCGCCGATGGTG |
| AbCapV E187A R | GAAGTAGTTCGCGAGCTTCTCAATGTAGTGTGGC |
| AbCapV N299A E304A F | GCGGAGGCTGCTGCCGCGATCACGCTCGACAACGC |
| AbCapV N299A E304A R | CGCGGCAGCAGCCTCCGCCGGGATCGTTTCGTCGATT |
| AbCapV E241A F | TAGCCCGGCGACCCTGTCCAAAAACAGCG |
| AbCapV E241A R | GACAGGGTCGCCGGGCTAATGCAGTAGTCC |
| AbCapV Y202F F | ACCCGAGCTTCATCGGTATTCGTGAGGTCCT |
| AbCapV Y202F R | TACCGATGAAGCTCGGGTTGTTTGCAAC |
| AbCapV Y251F F | CAAAGGTTTCCTGTCCCTGTGGAATATGGG |
| AbCapV Y251F R | AGGGACAGGAAACCTTTGCCGCTGTTTTTG |
| AbCapV W255F F | TGTCCCTGTTCAATATGGGTGAACGTATTGTGCT |
| AbCapV W255F R | CCATATTGAACAGGGACAGATAACCTTTGCC |
