# Supplementary material for: Molecular mechanisms of CBASS phospholipase effector CapV mediated membrane disruption
Source: Research Square preprint supplement (doi:10.21203/rs.3.rs-6158033/v1), 2025-04-01
Supplement: Supplementary file 1 [file ef6d36b8c8be10cf610cb49a.pdf]

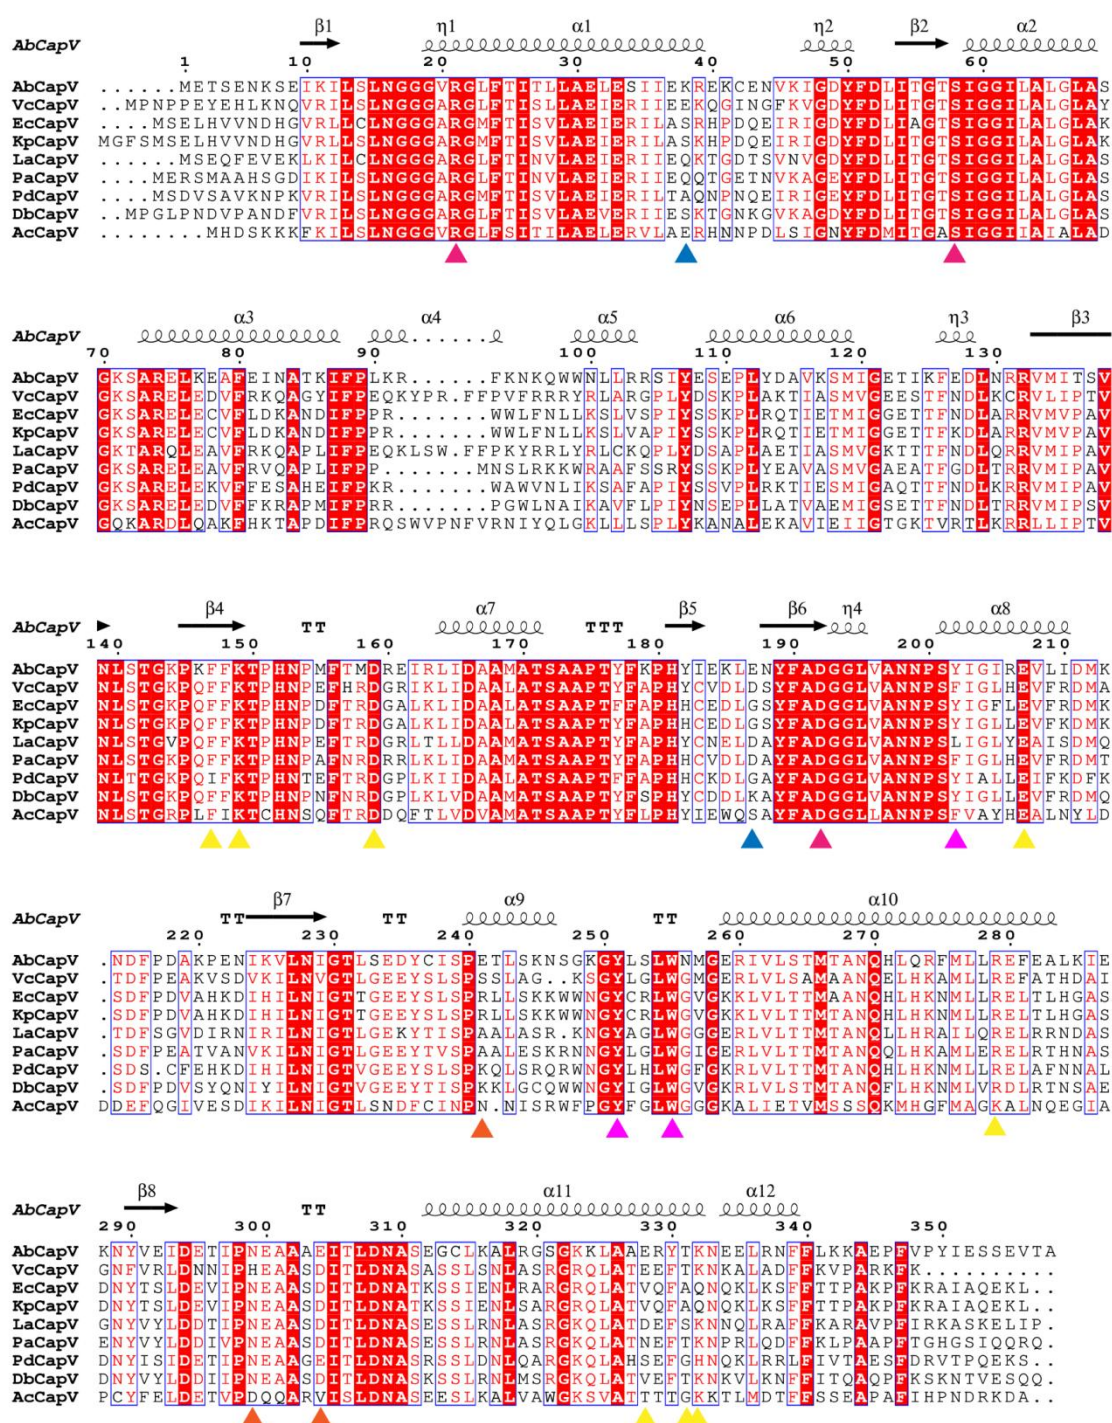

**b**

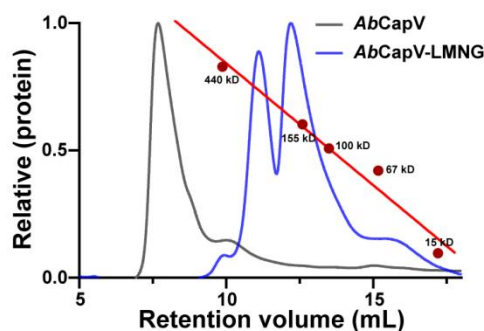

2    **3'3'-cGAMP.**

3    **a**, Alignment of divergent CapV homologs annotated with the determined secondary  
4    structure of *AbCapV*. Different colored triangles mark distinct active sites: red  
5    indicates phospholipid binding and cleavage sites, yellow marks cGAMP binding  
6    sites, blue represents the AC interaction interface, orange marks the BC interaction  
7    interface, and pink highlights the AB interaction interface. **b**, SEC demonstrating the  
8    effect of LMNG on the aggregation state of protein purification. The addition of  
9    detergent changed the protein into homodimer and homotetramer. The standard curve  
10   is represented in red.

11

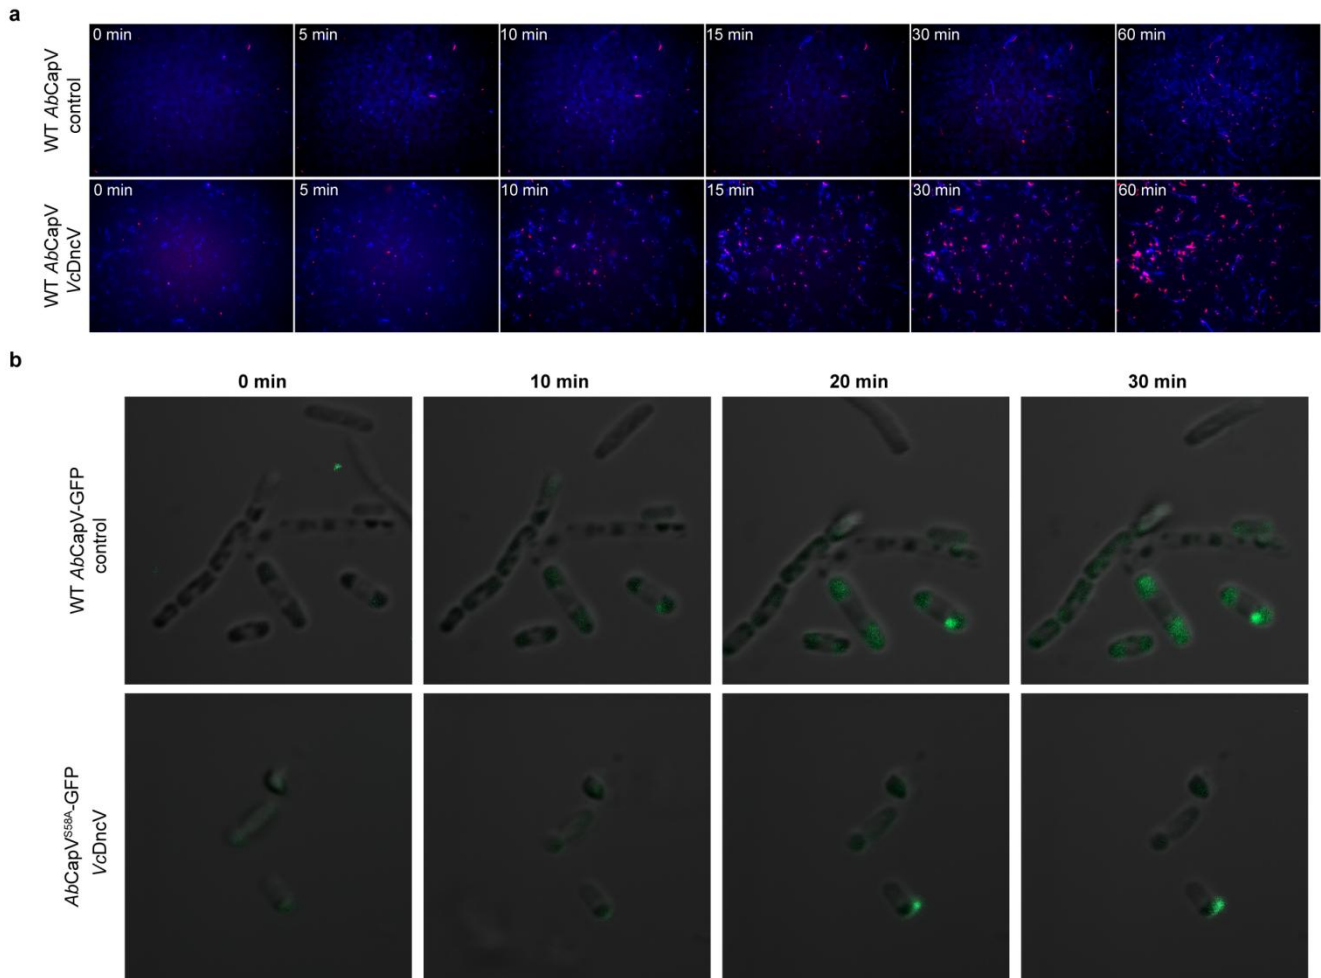

**Extended Data Fig. 2 CapV activation causes membrane disruption of one pole and cell death.**

**a**, Time-lapse fluorescence microscopy of *E. coli* expressing WT *AbCapV* and *VcDncV* or an *AbCapV* control. DAPI staining and PI staining were used to evaluate the cell states. Strong DAPI-staining dots represent bacteriophage particles. **b**, Time-lapse Confocal microscopy of *E. coli* expressing *AbCapV*<sup>S58A</sup>-GFP and *VcDncV* or an *AbCapV*<sup>S58A</sup>-GFP control.



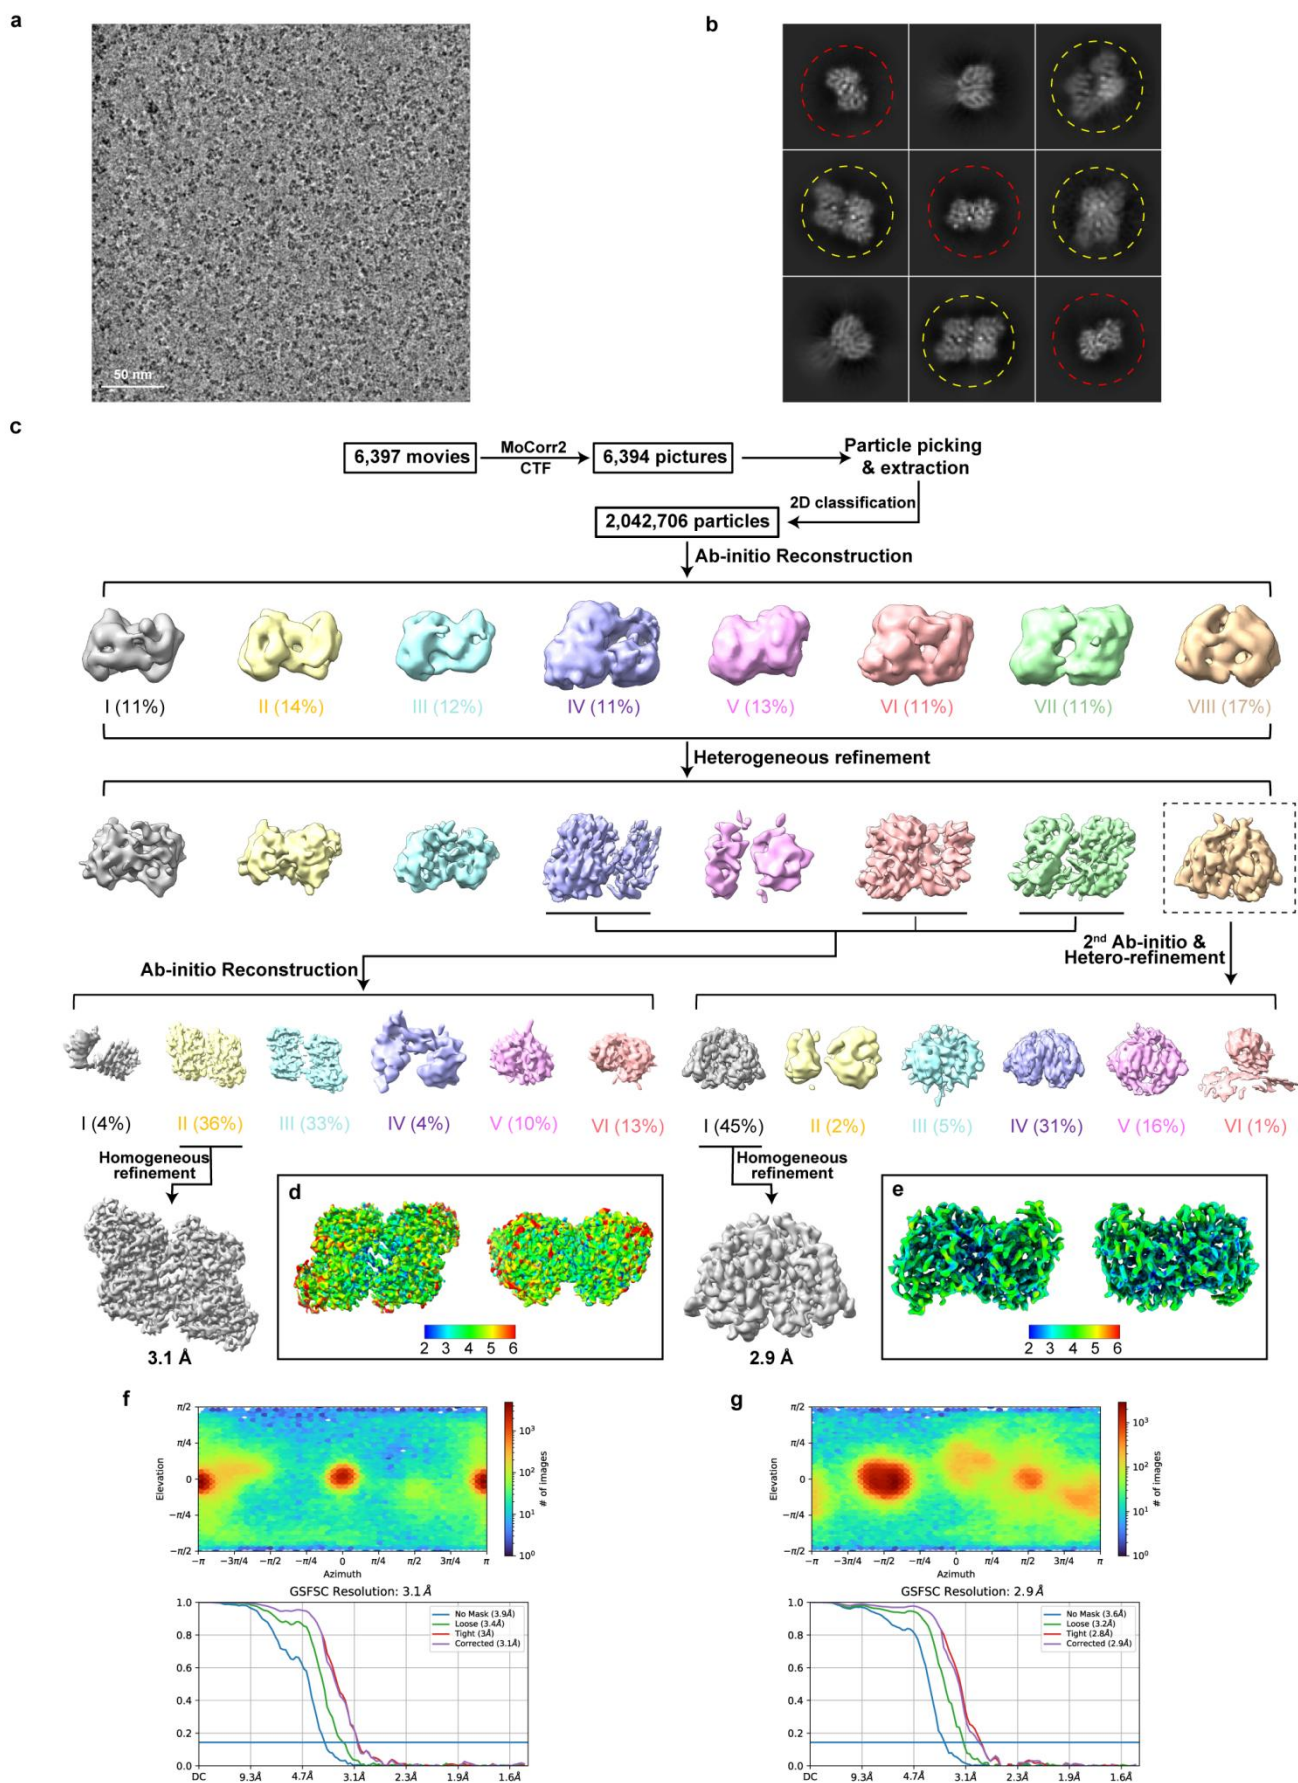

**Extended Data Fig. 3 Cryo-EM data processing for *AbCapV* apo state and intermediate state.**

**a**, Section of a representative electron micrograph of *AbCapV* apo state and intermediate state. **b**, Cryo-EM class averages of *AbCapV*. Particle classification and quantification for each condition demonstrates that *CapV* has two oligomeric states. **c**, Flow chart of cryo-EM data analysis of *AbCapV*. Two homo-oligomers (apo state and intermediate state) were obtained. Reconstructions of *AbCapV* tetramer (**d**) and dimer (**e**) were coloured by local resolution. The viewing direction distribution plot and the ‘gold-standar’ Fourier shell correlation (FSC) curves of *AbCapV* tetramer (**f**) and dimer (**g**) were presented.



44 volume of pocket was displayed with red density, and the side chains of the amino  
45 acids that block the channel have been displayed.



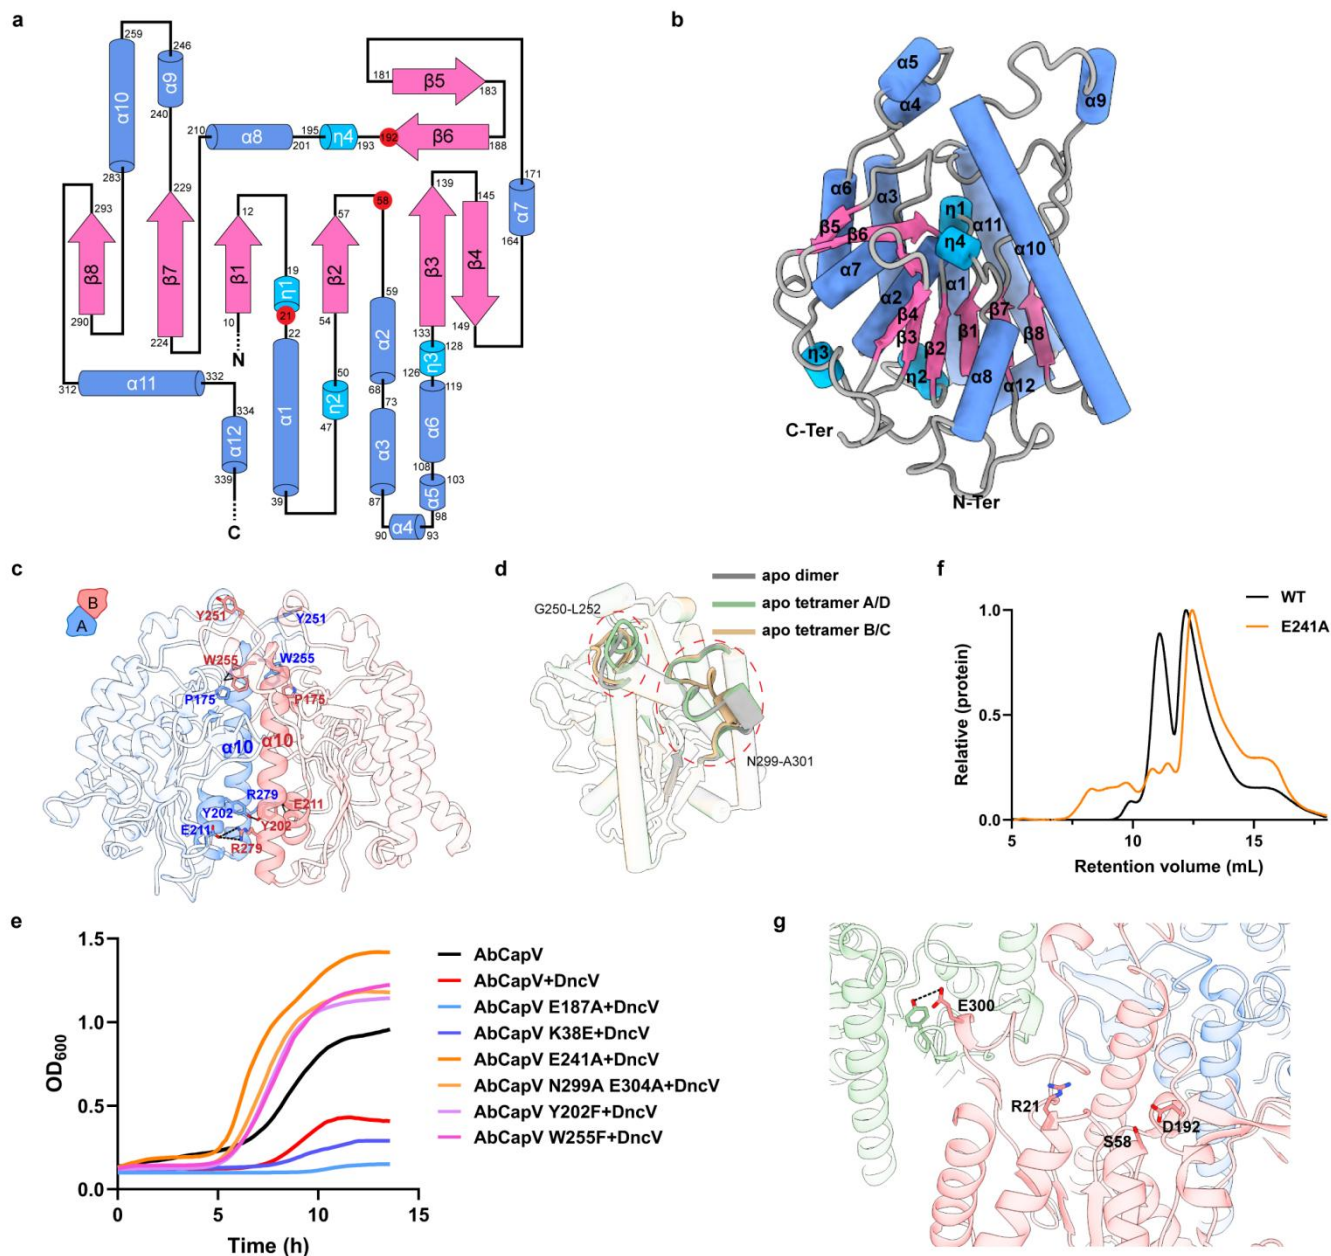

#### Extended Data Fig. 5 *AbCapV* exists as dimer and tetramer.

**a**, The topology diagram of *AbCapV*. Helices are shown as cylinders, and  $\beta$  sheets are shown as arrows. Three key active sites for phospholipid binding and hydrolysis are marked with red circles. **b**, The protomer structure from dimer labeled the secondary structure. **c**, Close-up views of *AbCapV* apo dimer interface including major interaction residues, and the hydrogen bond is depicted as a black dashed line. **d**, Superposition of subunits of apo dimer and apo tetramer *AbCapV*. The global changes have been highlighted. **e**, Growth curves of *E. coli* expressing *VcDncV* and *AbCapV* wt or interface mutants. The data are representative of more than three independent biological replicates each with three technical replicates. **f**, SEC demonstrating the effect of interface BC mutation E241A on aggregation state of apo protein. **g**, Expanded view of phospholipid-binding and cleaving residues in apo tetramer.



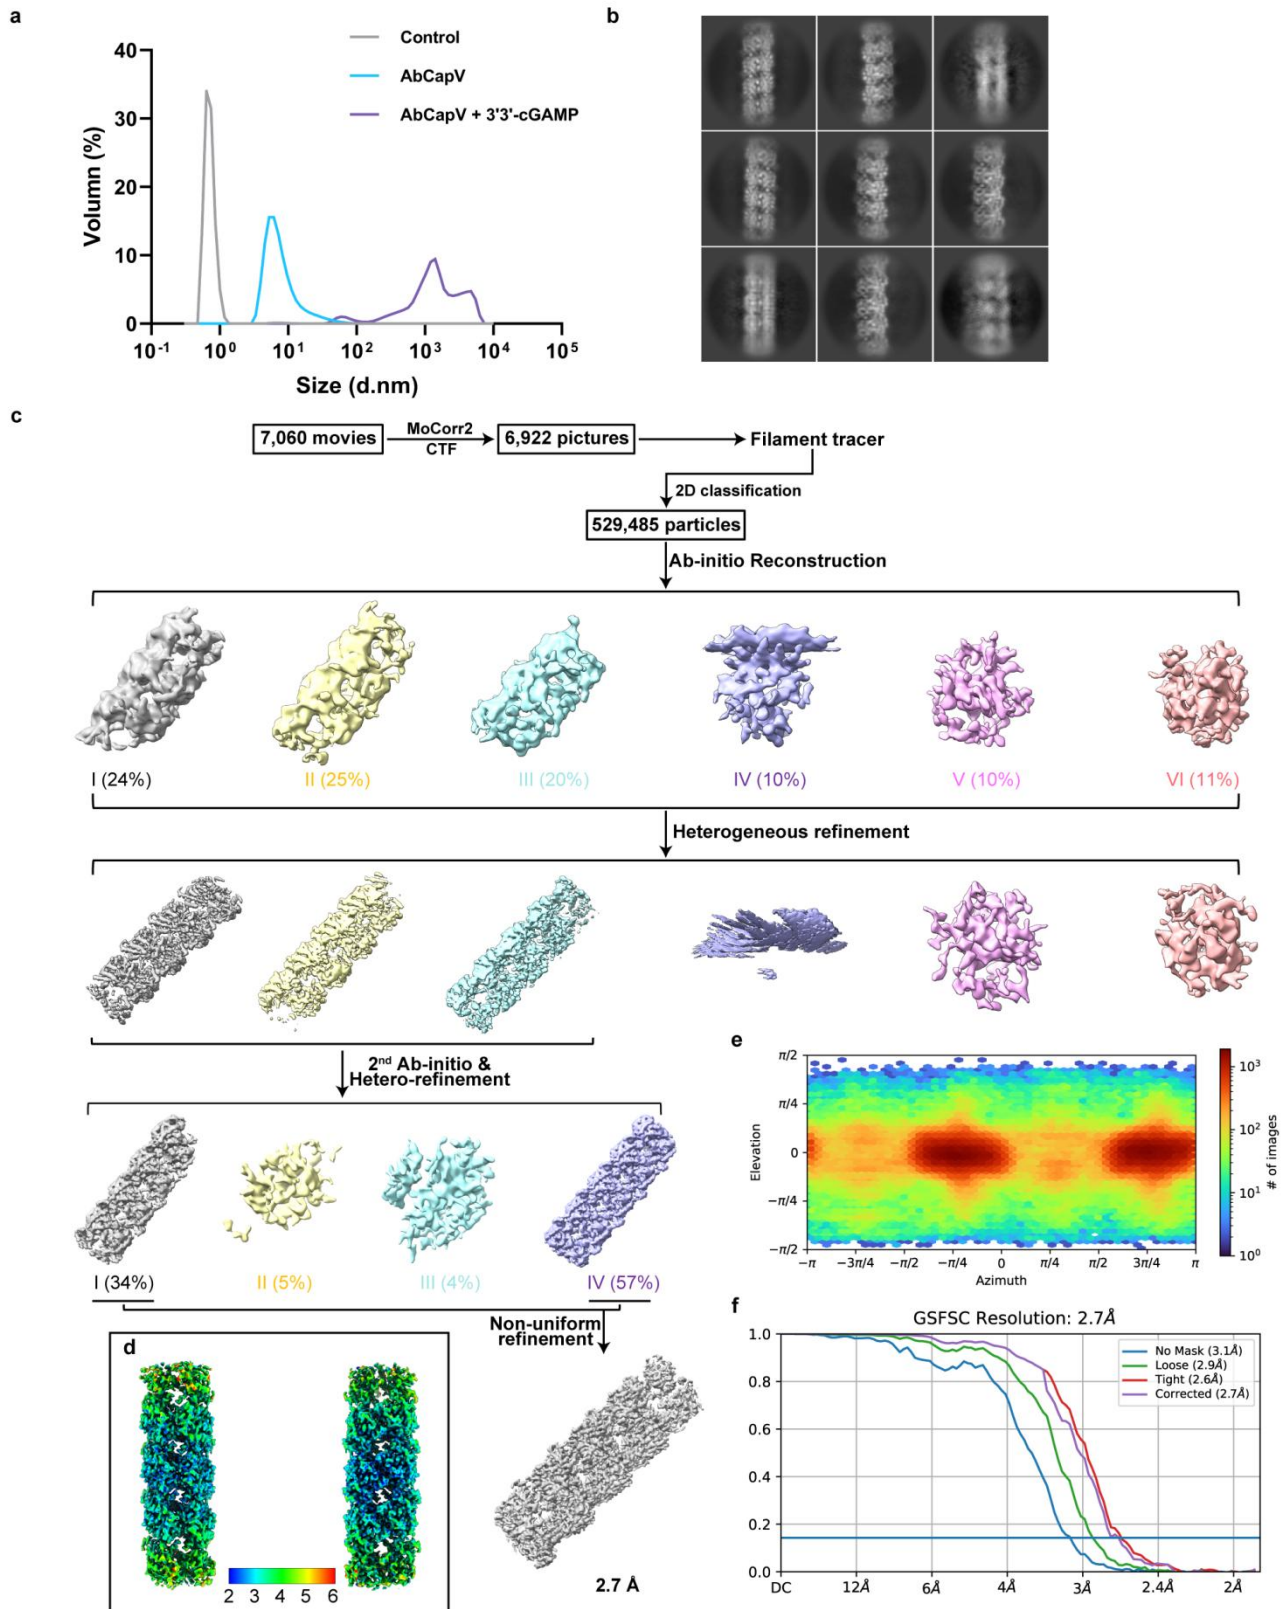

58 **Extended Data Fig. 6 Cryo-EM data processing for *AbCapV* filament bound to**  
 59 **3'3'-cGAMP.**

60 **a**, Volume particle size distributions of purified *AbCapV* in the presence of cGAMP  
 61 or other cyclic dinucleotides. **b**, Cryo-EM class averages of *AbCapV* bound to

62 3'3'-cGAMP. CapV filaments occurs in the presence of activating 3'3'-cGAMP. **c**,  
63 Flow chart of cryo-EM data analysis of *Ab*CapV filaments. Two homo-oligomers  
64 were obtained. Reconstructions of *Ab*CapV filaments (**d**) was colored by local  
65 resolution. The viewing direction distribution plot (**e**) and the 'gold-standard' Fourier  
66 shell correlation (FSC) curves (**f**) of *Ab*CapV filaments were presented.

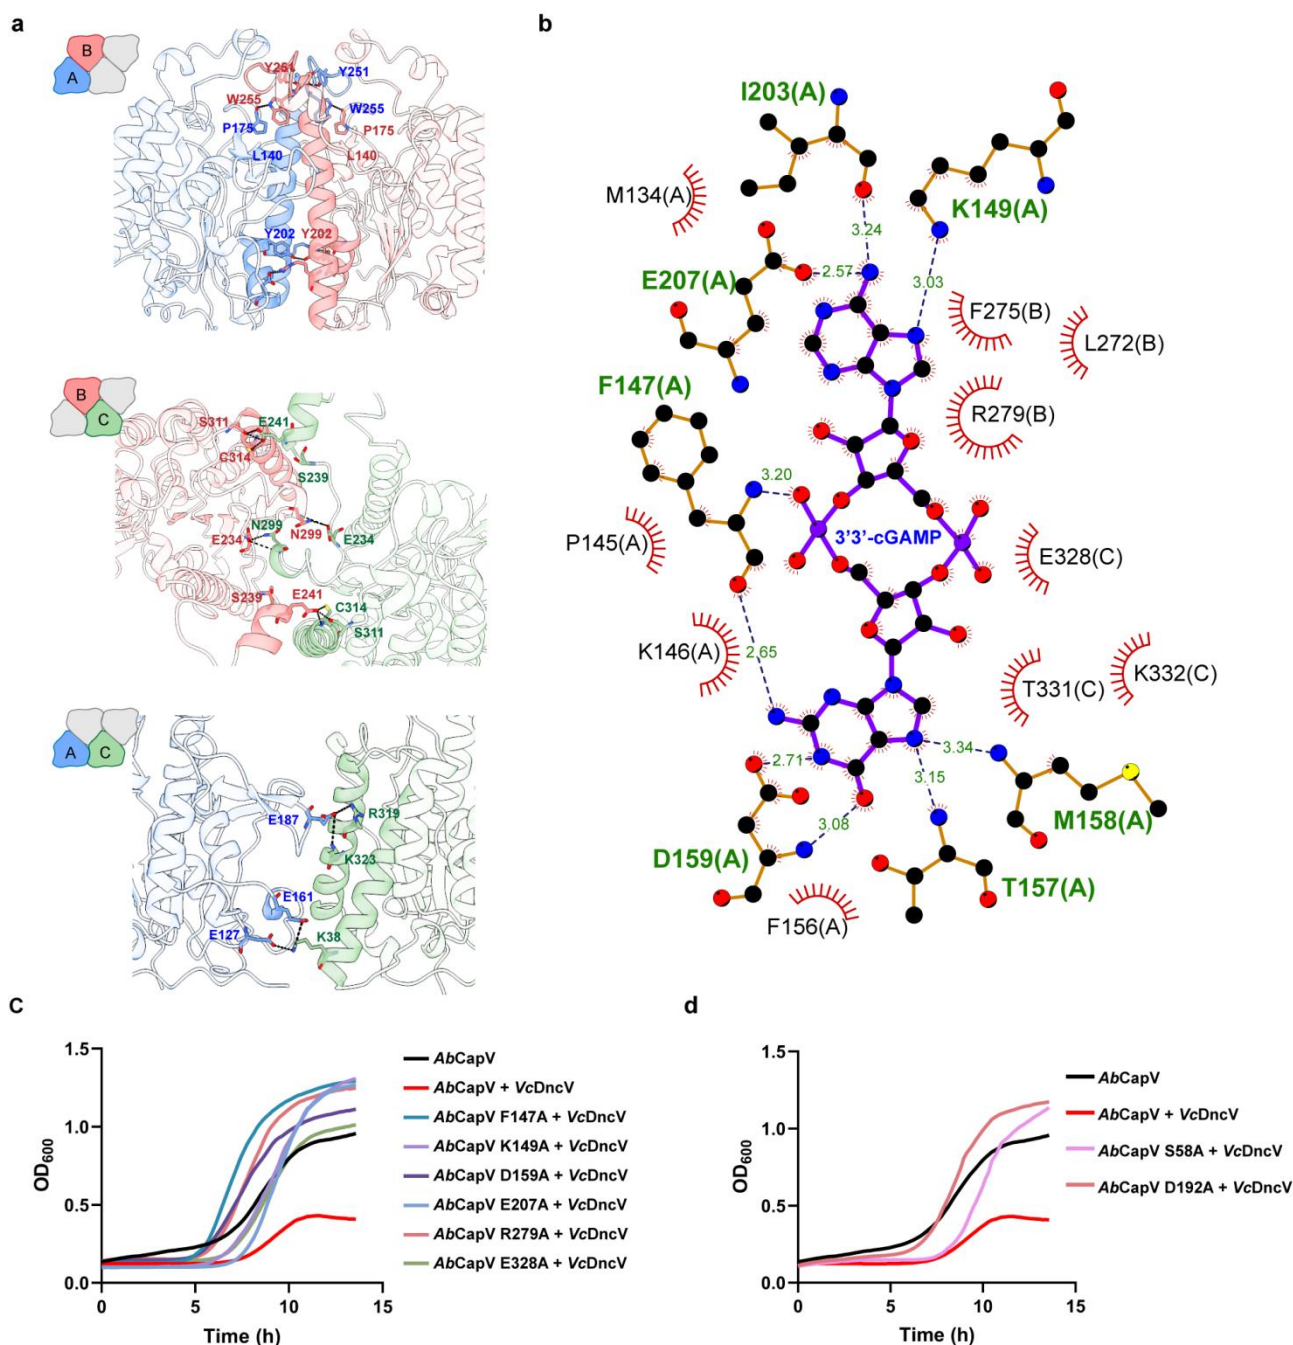

**Extended Data Fig. 7** CapV is activated by 3'3'-cGAMP to form filament and cleave phospholipids.

**a**, Close-up views of *AbCapV* filament interfaces including major interaction residues. Left, interface between protomer A and B. Middle, interface between protomer A and C. Right, interface between protomer B and C. Those residues in the interaction interface were labeled. **b**, LigPlot+ of the interactions between *AbCapV* and 3'3'-cGAMP. Numbers in colour specify inter-atom distances in Å. Hydrogen atoms are omitted. **c**, Growth curves of *E. coli* expressing *VcDncV* and *AbCapV* wt or cGAMP binding site mutants. The data are representative of more than three independent biological replicates each with three technical replicates. **d**, Growth curves of *E. coli* expressing *VcDncV* and *AbCapV* wt or phospholipid binding site

78 mutants. The data show means of three independent replicates. The data are  
79 representative of more than three independent biological replicates each with three  
80 technical replicates.



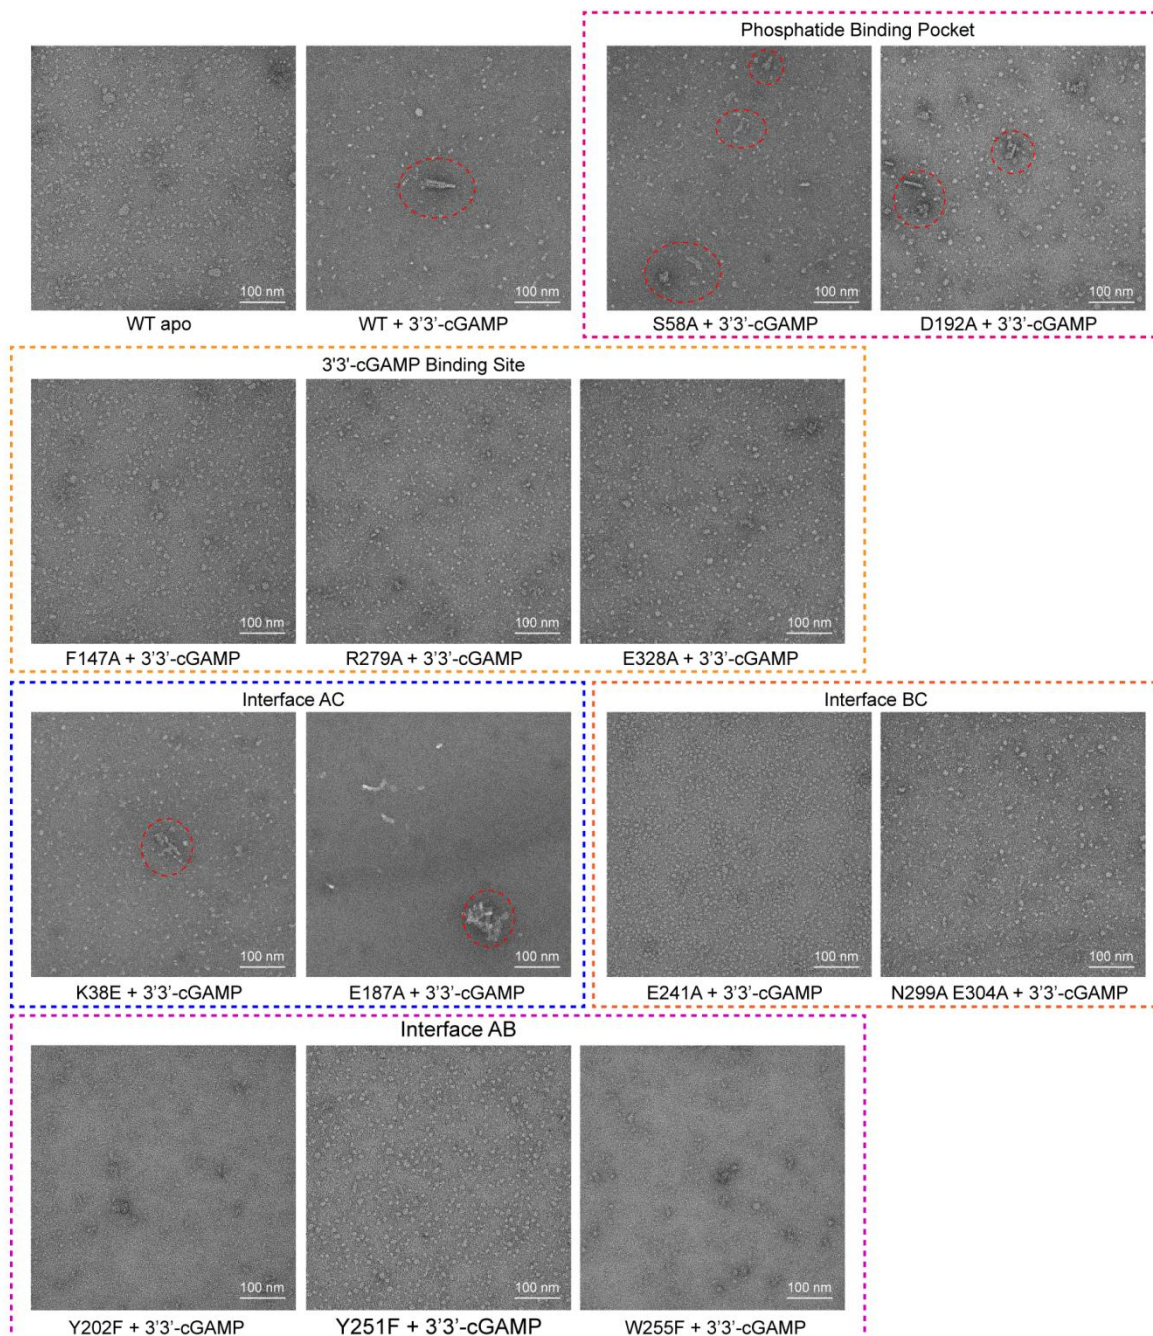

**Extended Data Fig. 8 3'3'-cGAMP mediated phospholipid cleavage activity is driven by *AbCapV* oligomerization.**

Negative-stain micrograph images for wild type *AbCapV* and mutants in the presence of 3'3'-cGAMP (right) or not (left). The aggregation of proteins were circled in red. Each image is representative of n = 6 micrograph images.

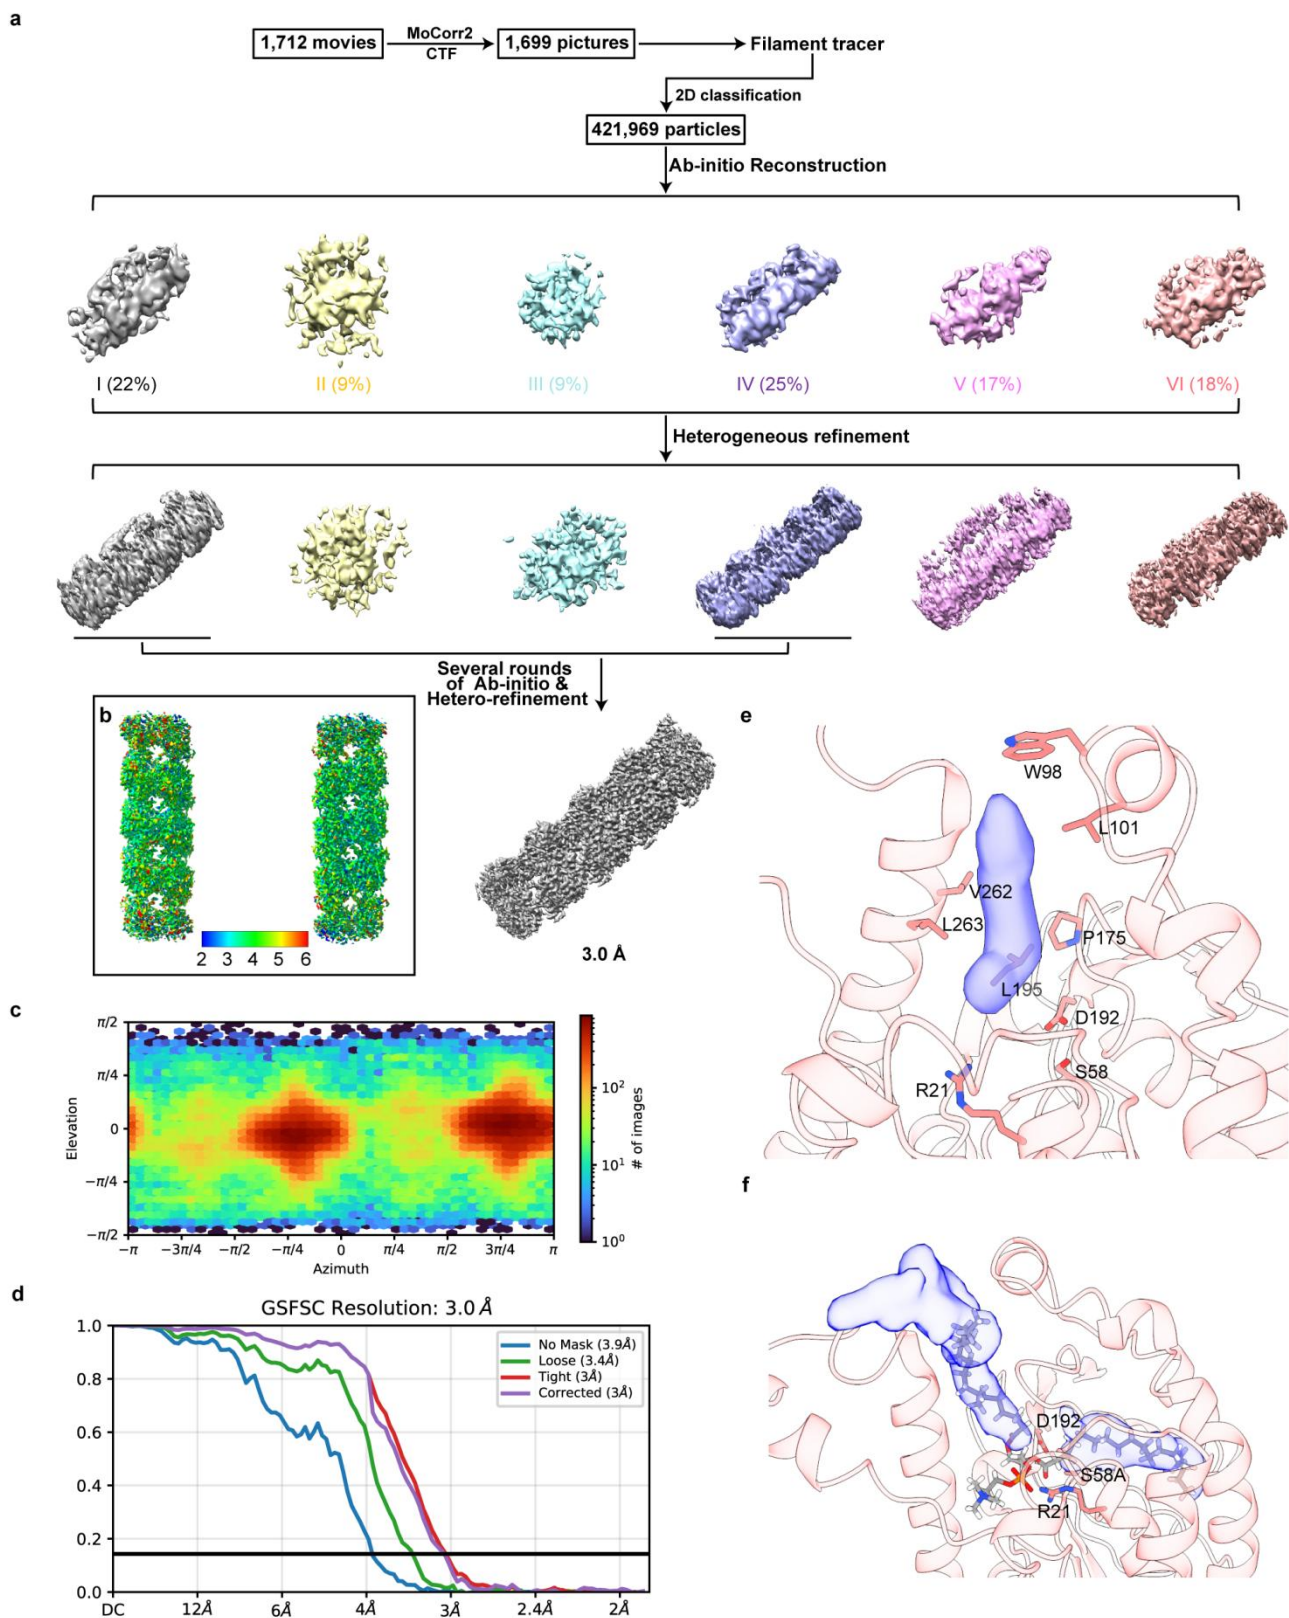

86 **Extended Data Fig. 9 Cryo-EM data processing for *AbCapV*<sup>S58A</sup> filament bound**  
 87 **to 3'3'-cGAMP.**

88 **a**, Flow chart of cryo-EM data analysis of *AbCapV*<sup>S58A</sup> filaments. Two  
 89 homo-oligomers (apo state and intermediate state) were obtained. Reconstructions of

90 *AbCapV*<sup>S58A</sup> filaments **(b)** was coloured by local resolution. The viewing direction  
91 distribution plot **(c)** and the ‘gold-standard’ Fourier shell correlation (FSC) curves **(d)**  
92 of *AbCapV*<sup>S58A</sup> filaments were presented. **e**, Zoom in on one substrate binding pocket  
93 of *AbCapV* filament with 3’3’-cGAMP bound. Corresponding interactions that  
94 contribute to phospholipid binding in *AbCapV*. **f**, Zoom in on one substrate binding  
95 pocket of *AbCapV*<sup>S58A</sup> filament with 3’3’-cGAMP bound. Phosphatidylcholine is  
96 utilized for modeling. Corresponding interactions that contribute to phospholipid  
97 binding in *AbCapV*.



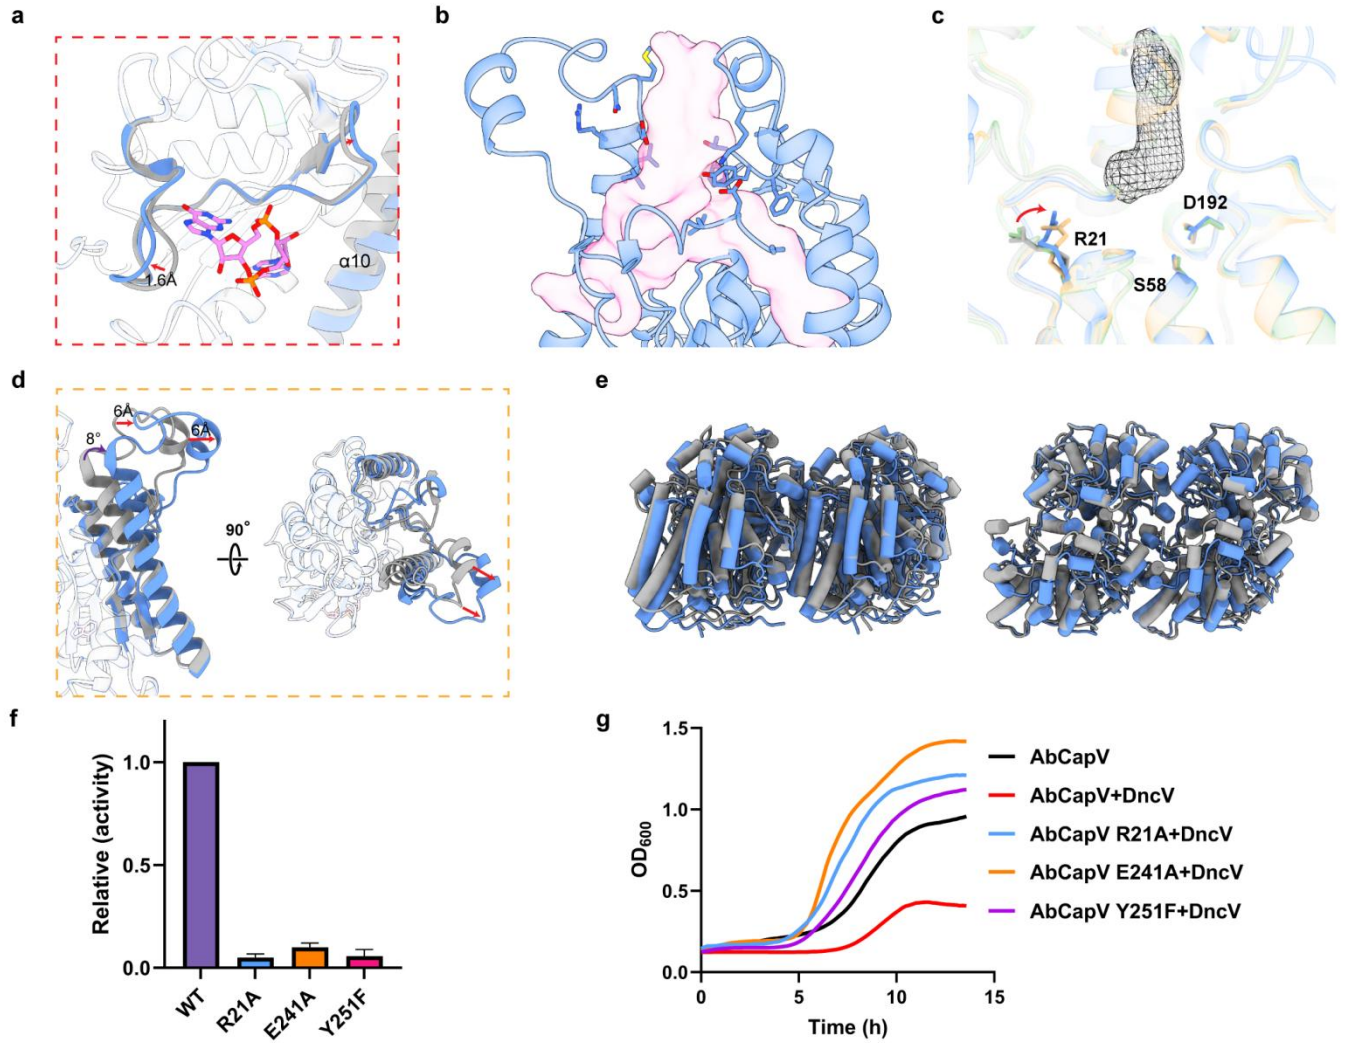

**Extended Data Fig. 10 Conformational changes of *AbCapV* induced by 3'3'-cGAMP.**

**a**, Red box, expanded view of the conformational changes around 3'3'-cGAMP binding pocket. The loop region near residue 156 undergoes a 1.6 Å shift. **b**, Zoom in on one substrate binding pocket of *AbCapV* filament with 3'3'-cGAMP bound. The conserved phospholipid binding pocket was displayed with red density. **c**, Expanded view of the comparison of R21, S58 and D192. Only R21 showed a significant conformational change. **d**, Yellow box, expanded view of the conformational changes around substrate binding pocket. The arrows indicate the direction of movements after activation.  $\alpha 10$  exhibits a pronounced 8° rotation around its C-terminal end, with the starting position of  $\alpha 10$  and  $\alpha 9$  moving by approximately 6 Å. **e**, Comparison of the tetramer in 3'3'-cGAMP bounded *AbCapV* filament with the *AbCapV* tetramer in the apo state. **f**, A bar-graph representation of phospholipid hydrolysis activity measured with the DOPE for a panel of *AbCapV* R21A, Y251F and E241A. The activity data of the mutants were normalized based on the activity data of the wild-type protein. The error bars indicate the standard deviation for the average of three biological replicates each with three technical replicates. **g**, Growth curves of *E. coli* expressing *VcDncV*.



115 and *AbCapV* wt or R21A, Y251F and E241A. The data are representative of more  
116 than three independent biological replicates each with three technical replicates.

**Extended Data Video 1 Conformational change of *AbCapV* from apo tetramer to filament. Chain C (green) has been aligned.**

**Extended Data Video 2. Procedure of *AbCapV* activation upon 3'3'-cGAMP binding**
